# Supplementary material for: Understanding the Mechanism of Action of the Anti-Dandruff Agent Zinc Pyrithione against Malassezia restricta
Source: PubMed Central journal article supplement (PMC6092343; doi:10.1038/s41598-018-30588-2), 2018-08-14
Supplement: 41598_2018_30588_MOESM1_ESM.pdf [file 41598_2018_30588_MOESM1_ESM.pdf]

# **Understanding the Mechanism of Action of the Anti-Dandruff Agent Zinc Pyrithione against *Malassezia restricta***

Minji Park<sup>1</sup>, Yong-Joon Cho<sup>2</sup>, Yang Won Lee<sup>3,4,\*</sup>, Won Hee Jung<sup>1,\*</sup>

<sup>1</sup>Department of Systems Biotechnology, Chung-Ang University, Anseong, 17546, Korea

<sup>2</sup>Korea Polar Research Institute, Incheon, 21990, Korea

<sup>3</sup>Department of Dermatology, School of Medicine, Konkuk University, Seoul, 05029, Korea

<sup>4</sup>Research Institute of Medicine, Konkuk University, Seoul, 05029, Korea

## **Short title: Mechanism of Action of Zinc Pyrithione**

### **Keywords:**

Anti-dandruff, *Malassezia*, mechanism of action, zinc pyrithione

### **\* Correspondence to:**

Won Hee Jung, PhD, Department of Systems Biotechnology, Chung-Ang University, Anseong, 17546, Korea, e-mail: whjung@cau.ac.kr

Yang Won Lee, MD, PhD, Department of Dermatology, School of Medicine, Konkuk University, Seoul, 05029, Korea, e-mail: 20050078@kuh.ac.kr

**Supplementary Table S1. Cellular metal analysis in ZPT treated *S. cerevisiae* W303**

|              | Fe            | Zn            | Mn          | Cu          |
|--------------|---------------|---------------|-------------|-------------|
| - ZPT        | 199.50 ± 2.31 | 413.55 ± 9.01 | 6.74 ± 0.12 | 2.48 ± 0.16 |
| + ZPT 1.5 µM | 172.20 ± 1.34 | 392.55 ± 3.85 | 6.52 ± 0.06 | 6.34 ± 0.10 |
| + ZPT 3 µM   | 183.29 ± 3.13 | 314.35 ± 4.34 | 6.93 ± 0.11 | 9.38 ± 0.06 |

\*All values represent weight (µg) per dry weight (g).

**Supplementary Table S3. Validation of RNA Sequencing data by qRT-PCR**

| Gene       | Description                                                                                   | Fold (ZPT 20 µM/ZPT 0 µM) |            |
|------------|-----------------------------------------------------------------------------------------------|---------------------------|------------|
|            |                                                                                               | RNA Sequencing            | qRT PCR    |
| MRES_03205 | Lipase (MrLip1)                                                                               | 0.16                      | 0.49±0.07  |
| MRES_03670 | Lipase (MrLip5)                                                                               | 0.14                      | 0.32±0.08  |
| MRES_03690 | Zinc-regulated transporter 1                                                                  | 0.65                      | 0.48±0.06  |
| MRES_04670 | Lipase (MrLip3)                                                                               | 0.08                      | 0.37±0.07  |
| MRES_04925 | Zn <sup>2+</sup> transporter Znt1 and related Cd <sup>2+</sup> /Zn <sup>2+</sup> transporters | 3.14                      | 4.30±0.15  |
| MRES_08605 | Iron/manganese superoxide dismutases                                                          | 0.07                      | 0.16±0.03  |
| MRES_11310 | Ferric reductase                                                                              | 0.19                      | 0.19±0.01  |
| MRES_14620 | Fe-S cluster assembly scaffold protein IscU                                                   | 6.38                      | 11.13±0.95 |
| MRES_16530 | Lipase                                                                                        | 0.14                      | 0.27±0.02  |

**Supplementary Table S4. Primers used for qRT-PCR**

| Primer            | Target gene | Sequence (5'-3')       |
|-------------------|-------------|------------------------|
| qRT.MRES_06100.F  | MRES_06100  | GCACCACACGTTCTACAACGA  |
| qRT.MRES_06100.R  |             | GTGAGAAGGACAGGGTGCTCTT |
| qRT.MRES_03205.F  | MRES_03205  | GCTGCGCGGCTCTTGTA      |
| qRT.MRES_03205.R  |             | TCGAACTACCGGCATGAAAGT  |
| qRT.MRES_03670.F  | MRES_03670  | GCCTCAAGGCTGGTCAGAAC   |
| qRT.MRES_032670.R |             | TTGAGCACGTGAAGCTTGGT   |
| qRT.MRES_03690.F  | MRES_03690  | ATGAGCTTGGGCAGGAGTGT   |
| qRT.MRES_03690.R  |             | CGTACGCCATCGGGTAATTC   |
| qRT.MRES_04670.F  | MRES_04670  | CACGGCGCCGACATTC       |
| qRT.MRES_04670.R  |             | ACGCGTGGCCCATCAC       |
| qRT.MRES_04925.F  | MRES_04925  | CGCTGTGCGCCTCGTAA      |
| qRT.MRES_04925.R  |             | GCTGCCATCCATACGAATACTG |
| qRT.MRES_08605.F  | MRES_08605  | AGCCAGGGCGGTGGTAA      |
| qRT.MRES_08605.R  |             | CCTTTTCGATGGCCTGCTT    |
| qRT.MRES_11310.F  | MRES_11310  | GCTGGCGTCCAGGACAAC     |
| qRT.MRES_11310.R  |             | TGCGTAGCAGCCATTCCA     |
| qRT.MRES_14620.F  | MRES_14620  | CAACGTCGGCTCGTTTGC     |
| qRT.MRES_14620.R  |             | GCACCAACGAGGCCGATA     |
| qRT.MRES_16530.F  | MRES_16530  | TTCACTGCGCTGGGAACA     |
| qRT.MRES_16530.R  |             | GGTTGTAGAACCTGTCGTCATC |

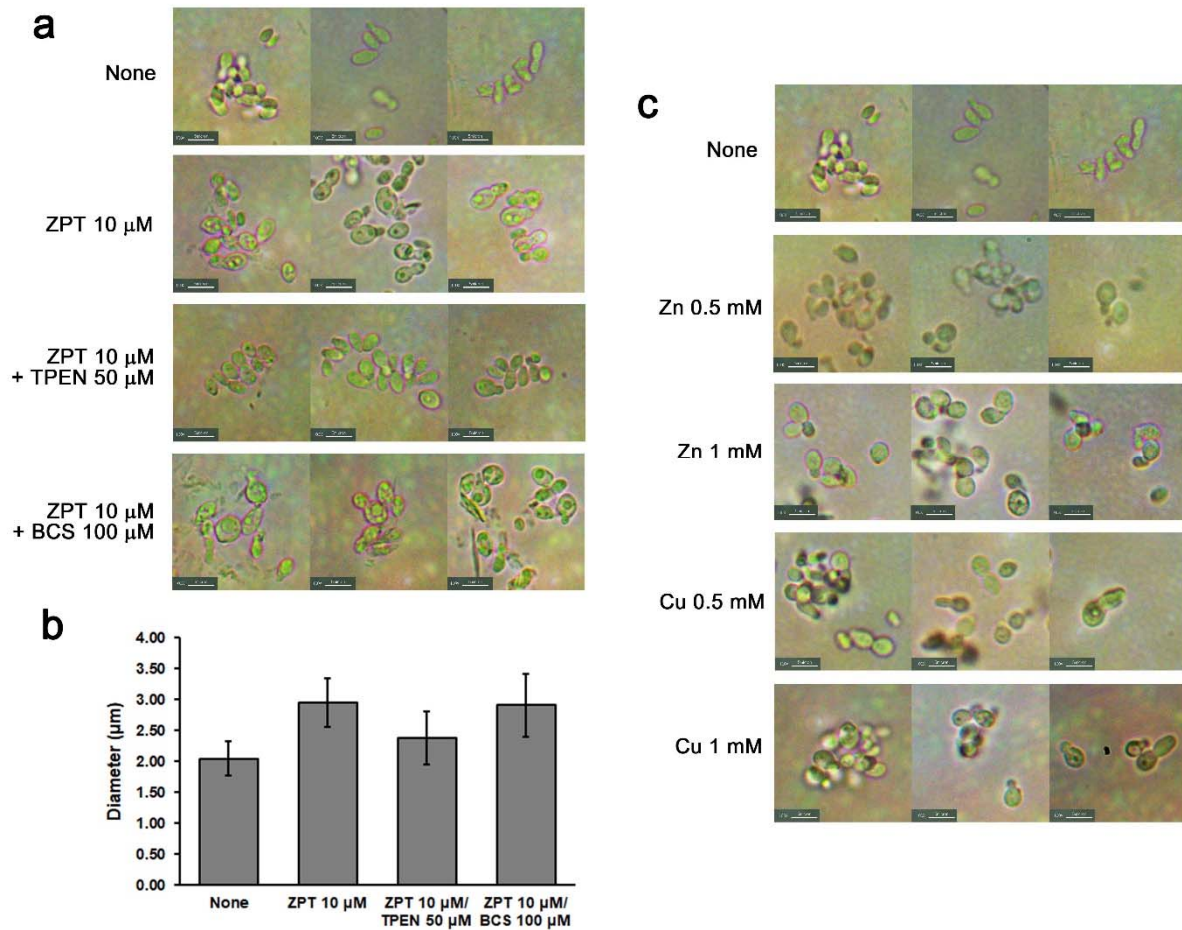

**Supplementary Figure S1.** (a) Morphology of *M. restricta* KCTC 27527 cells in the absence or presence of 10  $\mu\text{M}$  ZPT with 50  $\mu\text{M}$  TPEN or 100  $\mu\text{M}$  BCS. (b) The diameter of 100 cells was measured, and averages were compared. (c) Morphology of *M. restricta* KCTC 27527 cells in the presence of 0.5 mM and 1 mM  $\text{ZnCl}_2$  and  $\text{CuCl}_2$ . The scale bar represents 5  $\mu\text{m}$ .

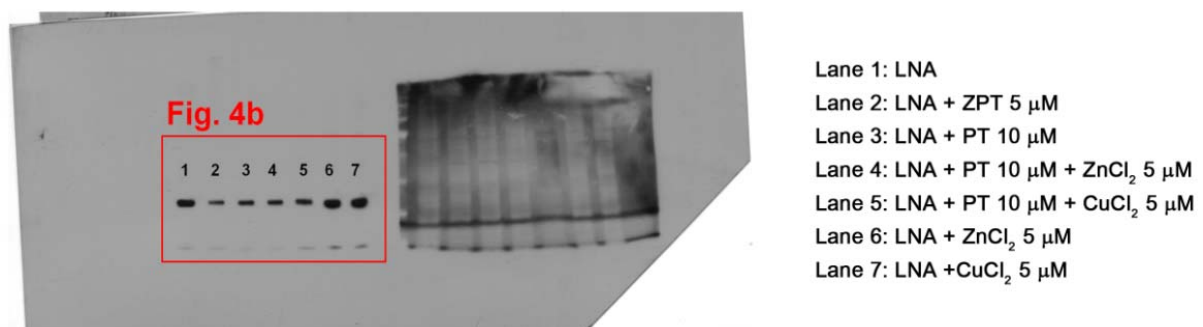

**Supplementary Figure S2.** The scanned full-length blots of the MrLip1 expression in *M. restricta* KCTC 27527. In the original blots, we selected lane 1, 2, 6 and 7 to show ZPT effect on MrLip1 and cropped the blots.

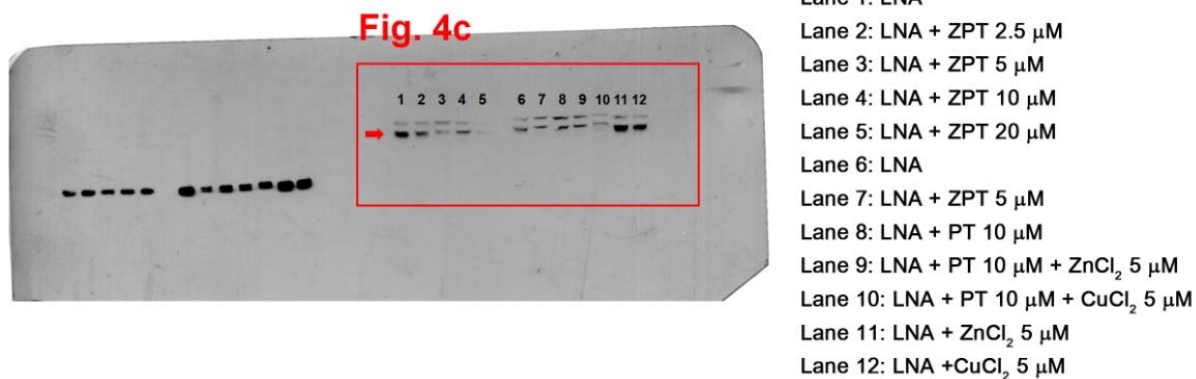

**Supplementary Figure S3.** The scanned full-length blots of the MrLip5 expression in *M. restricta* KCTC 27527. In the original blots, we selected lane 1, 7, 11 and 12 to show ZPT effect on MrLip5 and cropped the blots.

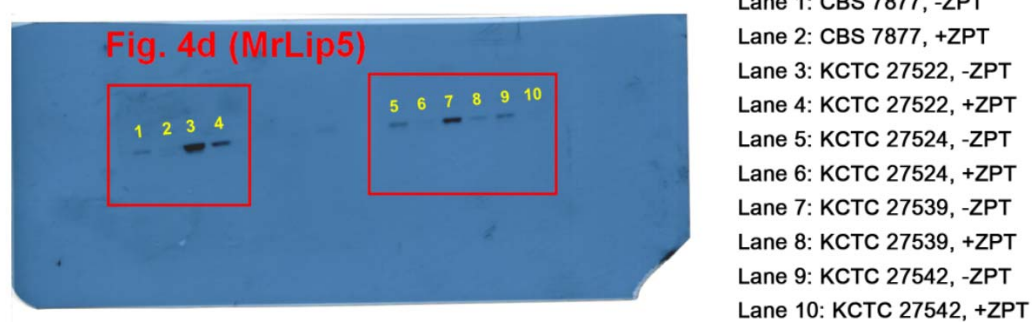

**Supplementary Figure S4.** The scanned full-length blots of the MrLip5 expression in various clinical isolates of *M. restricta*. We cropped and assembled the blots.
